# Supplementary material for: Whole-Genome Sequence of Lactococcus lactis Subsp. lactis LL16 Confirms Safety, Probiotic Potential, and Reveals Functional Traits
Source: MDPI journal article supplement (doi:10.3390/microorganisms11041034), 2023-04-15
Supplement: s1 [file s1]

**Figure S1.** Closest phylogenetic relatives of *L. lactis* LL16 generated with RAST SEED analysis

| Genome ID ▲▼              | Score ▲▼ | Genome Name ▲▼                                    |
|---------------------------|----------|---------------------------------------------------|
| <a href="#">272623.1</a>  | 500      | Lactococcus lactis subsp. lactis II1403           |
| <a href="#">889201.3</a>  | 432      | Streptococcus cristatus ATCC 51100                |
| <a href="#">388919.8</a>  | 432      | Streptococcus sanguinis SK36                      |
| <a href="#">391296.7</a>  | 430      | Streptococcus suis 98HAH33                        |
| <a href="#">467705.8</a>  | 430      | Streptococcus gordonii str. Challis substr. CH1   |
| <a href="#">205921.3</a>  | 425      | Streptococcus agalactiae A909                     |
| <a href="#">160491.17</a> | 422      | Streptococcus pyogenes str. Manfredo              |
| <a href="#">552526.7</a>  | 421      | Streptococcus equi subsp. zooepidemicus MGCS10565 |
| <a href="#">160490.1</a>  | 415      | Streptococcus pyogenes M1 GAS                     |
| <a href="#">210007.1</a>  | 405      | Streptococcus mutans UA159                        |
| <a href="#">293653.3</a>  | 404      | Streptococcus pyogenes MGAS5005                   |
| <a href="#">171101.1</a>  | 400      | Streptococcus pneumoniae R6                       |
| <a href="#">299768.3</a>  | 398      | Streptococcus thermophilus CNRZ1066               |
| <a href="#">246201.1</a>  | 396      | Streptococcus mitis NCTC 12261                    |
| <a href="#">226185.1</a>  | 313      | Enterococcus faecalis V583                        |
| <a href="#">565654.4</a>  | 305      | Enterococcus casseliflavus EC10                   |
| <a href="#">482234.3</a>  | 196      | Streptococcus canis FSL Z3-227                    |
| <a href="#">169963.1</a>  | 193      | Listeria monocytogenes EGD-e                      |
| <a href="#">525364.3</a>  | 181      | Lactobacillus salivarius ATCC 11741               |
| <a href="#">272626.1</a>  | 178      | Listeria innocua Clip11262                        |
| <a href="#">563194.3</a>  | 161      | Pediococcus acidilactici 7_4                      |
| <a href="#">224308.1</a>  | 135      | Bacillus subtilis subsp. subtilis str. 168        |
| <a href="#">321967.8</a>  | 132      | Lactobacillus casei ATCC 334                      |
| <a href="#">525328.4</a>  | 129      | Lactobacillus iners DSM 13335                     |
| <a href="#">387344.13</a> | 123      | Lactobacillus brevis ATCC 367                     |
| <a href="#">272621.3</a>  | 117      | Lactobacillus acidophilus NCFM                    |
| <a href="#">491915.4</a>  | 113      | Anoxybacillus flavithermus WK1                    |
| <a href="#">279010.5</a>  | 113      | Bacillus licheniformis ATCC 14580                 |
| <a href="#">420246.5</a>  | 110      | Geobacillus thermodenitrificans NG80-2            |
| <a href="#">235909.3</a>  | 106      | Geobacillus kaustophilus HTA426                   |

**Table S1.** Probiotic characteristics based on *L. lactis* LL16 genome analysis with RAST SEED

| Gene Function                                                                                           | Size (bp)              |
|---------------------------------------------------------------------------------------------------------|------------------------|
| <b>Adhesion and aggregation</b>                                                                         |                        |
| Enolase                                                                                                 | 1269                   |
| Fibronectin-binding protein                                                                             | 1623                   |
| Exopolysaccharides (EPS) biosynthesis                                                                   |                        |
| EPS biosynthesis protein                                                                                | 840                    |
| Glycosyl transferase                                                                                    | 1221/1329/321/1215/927 |
| Glycosyl transferase, group 1 family protein                                                            | -                      |
| Glycosyl transferase, group 2 family protein                                                            | 180/150/420/714/1056   |
| Manganese-dependent protein-tyrosine phosphatase                                                        | 420                    |
| Tyrosine-protein kinase EpsD                                                                            | 582                    |
| Tyrosine-protein kinase transmembrane modulator EpsC                                                    | 684                    |
| Triosephosphate isomerase                                                                               | 759                    |
| AntiadhesinPIs                                                                                          | -                      |
| Sortase A, LPXTG                                                                                        | 1296/747               |
| ATP synthase $\epsilon$ chain                                                                           | 426                    |
| DNA polymerase III, $\epsilon$ related 3'-5' exonuclease                                                | -                      |
| Mucus-binding protein                                                                                   | -                      |
| <b>Vitamin biosynthesis</b>                                                                             |                        |
| <b>Thiamine</b>                                                                                         |                        |
| Cytosine/purine/uracil/thiamine/allantoin permease family protein                                       | -                      |
| HMP-PP hydrolase (pyridoxal phosphatase) Cof                                                            | -                      |
| Hydroxyethylthiazole kinase                                                                             | 753                    |
| Hydroxymethylpyrimidine ABC transporter: ATPase component                                               | -                      |
| Hydroxymethylpyrimidine ABC transporter: substrate-binding component                                    | -                      |
| Hydroxymethylpyrimidine ABC transporter: transmembrane component                                        | -                      |
| Hydroxymethylpyrimidine kinase                                                                          | 804                    |
| Thiamin ECF transporter: substrate-specific component ThiT                                              | 549                    |
| Thiazole ECF transporter: substrate-specific component ThiW                                             | -                      |
| Thiamin pyrophosphokinase                                                                               | 636                    |
| Thiaminase II involved in salvage of thiamin pyrimidine moiety                                          | 657                    |
| Xanthine/uracil/thiamine/ascorbate permease family protein                                              | 1422                   |
| <b>Riboflavin</b>                                                                                       |                        |
| 3,4-dihydroxy-2-butanone 4-phosphate synthase                                                           | -                      |
| 6,7-dimethyl-8-ribityllumazine synthase                                                                 | -                      |
| ATP phosphoribosyltransferase                                                                           | -                      |
| Diacylglycerol kinase                                                                                   | -                      |
| Diaminohydroxyphosphoribosylaminopyrimidine deaminase/5-amino-6-(5-phosphoribosylamino)uracil reductase | -                      |
| Hypothetical protein YebC                                                                               | -                      |
| NADH dehydrogenase                                                                                      | 261/1260/2004          |
| N-terminal domain of CinA protein, C-terminal domain of CinAtype S                                      | -                      |
| Orotidine 5'-phosphate decarboxylase                                                                    | -                      |

|                                                                         |                  |
|-------------------------------------------------------------------------|------------------|
| Phosphoribosyl-AMP cyclohydrolase/Phosphoribosyl-ATP pyrophosphatase    | 639              |
| Riboflavin kinase/FMN adenylyltransferase                               | -                |
| Riboflavin synthase eubacterial/eukaryotic                              | -                |
| Ribulose-phosphate 3-epimerase                                          | 651              |
| Riboflavin ECF transporter: substrate-specific component RibU           | -                |
| Transcription termination protein NusB                                  | 858              |
| tRNA pseudouridine synthase B                                           | -                |
| <b>Pyridoxin</b>                                                        |                  |
| D-3-phosphoglycerate dehydrogenase                                      | 1197             |
| Hypothetical NagD-like phosphatase                                      | 774              |
| 1-deoxy-D-xylulose 5-phosphate synthase                                 | -                |
| Pyridoxamine 5'-phosphate oxidase                                       | 378/504          |
| Pyridoxine biosynthesis glutamine amidotransferase, glutaminase subunit | -                |
| NAD-dependent glyceraldehyde-3-phosphate dehydrogenase                  | 1014/1011        |
| <b>Biotin</b>                                                           |                  |
| 3-ketoacyl-CoA thiolase/Acetyl-CoA acetyltransferase                    | 696/276/144/1140 |
| Acetoacetyl-CoA synthetase/Long-chain-fatty-acid-CoA ligase             | -                |
| Adenosylmethionine-8-amino-7-oxononanoate aminotransferase              | -                |
| Biotin ECF transporter: ATPase component BioM of energizing module      | -                |
| Biotin ECF transporter: substrate-specific component BioY               | 465/570          |
| Biotin synthase                                                         | -                |
| Biotin—protein ligase                                                   | 753              |
| Biotin operon repressor                                                 | 972              |
| Competence protein F homolog, phosphoribosyltransferase domain          | 651              |
| Long-chain-fatty-acid-CoA ligase                                        | 1242             |
| Biotin carboxyl carrier protein of acetyl-CoA carboxylase               | 468              |
| Biotin carboxyl carrier protein of methylcrotonyl-CoA carboxylase       | -                |
| Biotin carboxylase of acetyl-CoA carboxylase                            | 1368             |
| Biotin carboxylase of methylcrotonyl-CoA carboxylase                    | -                |
| <b>Folate</b>                                                           |                  |
| Dihydrofolate synthase/folylpolyglutamate synthase                      | 1284             |
| GTP cyclohydrolase I type 1                                             | 774              |
| Pantoate— $\beta$ -alanine ligase                                       | -                |
| Aspartate 1-decarboxylase                                               | -                |
| 2-amino-4-hydroxy-6-hydroxymethyldihydropteridine pyrophosphokinase     | 1050             |
| Dihydroneopterin aldolase                                               | 351              |
| Dihydropteroate synthase                                                | 234/765          |
| Cell division protein FtsH                                              | 2088             |
| Hypoxanthine-guanine phosphoribosyltransferase                          | 543/552          |
| tRNA (Ile)-lysidine synthetase                                          | 1272             |
| Para-aminobenzoate synthase, amidotransferase component                 | 537              |
| 5-formyltetrahydrofolate cyclo-ligase                                   | 534              |
| Dihydrofolate reductase                                                 | 507              |

|                                                                                                         |                |
|---------------------------------------------------------------------------------------------------------|----------------|
| Thymidylate synthase                                                                                    | 840            |
| Dihydroneopterin triphosphate pyrophosphohydrolase                                                      | 498            |
| <b>Amino acids metabolism</b>                                                                           |                |
| <b>Threonine</b>                                                                                        |                |
| Biosynthetic aromatic amino acid aminotransferase $\alpha$                                              | -              |
| Aspartokinase                                                                                           | 1353           |
| Homoserine dehydrogenase                                                                                | 1266           |
| Aspartate aminotransferase                                                                              | 1131/1182/1155 |
| Aspartate-semialdehyde dehydrogenase                                                                    | 1077           |
| Homoserine kinase                                                                                       | 849            |
| Threonine synthase                                                                                      | 1491           |
| <b>Tryptophan</b>                                                                                       |                |
| Tryptophan synthase $\alpha$ chain                                                                      | 762            |
| Tryptophan synthase $\beta$ chain                                                                       | 1209           |
| Phosphoribosylformimino-5-aminoimidazole carboxamide ribotide isomerase                                 | 720            |
| Para-aminobenzoate synthase, amidotransferase component                                                 | 537            |
| Isochorismatase                                                                                         | 495/624        |
| Indole-3-glycerol phosphate synthase                                                                    | 795            |
| Anthranilate phosphoribosyltransferase                                                                  | 1008           |
| Anthranilate synthase, amidotransferase component                                                       | 597            |
| Para-aminobenzoate synthase, aminase component (EC 2.6.1.85) / Aminodeoxychorismate lyase (EC 4.1.3.38) | 1887           |
| Isochorismate synthase (EC 5.4.4.2) Menaquinone-specific isochorismate synthase (EC 5.4.4.2)            | 474/606        |
| Phosphoribosylanthranilate isomerase (EC 5.3.1.24)                                                      | 1056           |
| Anthranilate synthase, aminase component                                                                | 1371           |
| <b>Methionine</b>                                                                                       |                |
| Cystathionine $\gamma$ -lyase                                                                           | 1143           |
| Cystathionine $\gamma$ -synthase                                                                        | 1089           |
| Cystathionine beta-lyase (EC 4.4.1.8)                                                                   | 603            |
| S-adenosylmethionine synthase                                                                           | 123            |
| Serine acetyltransferase                                                                                | 600            |
| Homoserine O-succinyltransferase                                                                        | 960            |
| Methionine ABC transporter ATP-binding protein                                                          | 1107           |
| 5-methyltetrahydrofolate—homocysteine methyltransferase                                                 | 1176/1059      |
| 5,10-methylenetetrahydrofolate reductase                                                                | 852            |
| O-acetylhomoserine sulfhydrylase                                                                        | 1281           |
| SAM-dependent methlytransferase YrrT                                                                    | -              |
| <b>Leucine</b>                                                                                          |                |
| 3-isopropylmalate dehydrogenase                                                                         | 1038           |
| Isopropylmalate isomerase                                                                               | -              |
| 3-isopropylmalate dehydratase small subunit (EC 4.2.1.33)                                               | 576            |
| 3-isopropylmalate dehydratase large subunit (EC 4.2.1.33)                                               | 1383           |
| 2-isopropylmalate synthase                                                                              | 1542           |
| <b>Lysine</b>                                                                                           |                |
| Aspartokinase                                                                                           | 1353           |
| Lysine $\epsilon$ -oxidase                                                                              | -              |
| 4-hydroxy-tetrahydrodipicolinate synthase                                                               | 894            |

|                                                                             |                 |
|-----------------------------------------------------------------------------|-----------------|
| 4-hydroxy-tetrahydrodipicolinate reductase                                  | 783             |
| Aspartate-semialdehyde dehydrogenase                                        | 1077            |
| Diaminopimelate decarboxylase                                               | 1260            |
| N-acetyldiaminopimelate deacetylase                                         | 1155            |
| 2,3,4,5-tetrahydropyridine-2,6-dicarboxylate N-acetyltransferase            | 771             |
| N-acetyl-L,L-diaminopimelate aminotransferase                               | 1176            |
| <b>Cysteine</b>                                                             |                 |
| Cysteine synthase                                                           | 921/933         |
| Phosphoadenylyl-sulfate reductase (thioredoxin)                             | 315             |
| Cysteinyl-tRNA synthetase                                                   | 1347            |
| Sulfite reductase [NADPH] hemoprotein $\beta$ -component                    | -               |
| Sulfite reductase [NADPH] flavoprotein $\alpha$ -component                  | -               |
| <b>Histidine</b>                                                            |                 |
| Phosphoribosyl-AMP cyclohydrolase                                           | 639             |
| Imidazole glycerol phosphate synthase, regulatory subunit                   | -               |
| Imidazole glycerol phosphate synthase amidotransferase subunit              | 609             |
| HisH                                                                        |                 |
| Imidazole glycerol phosphate synthase cyclase subunit                       | 780             |
| Imidazole-glycerol-phosphate dehydratase                                    | 603             |
| Histidinol dehydrogenase                                                    | 114/1194        |
| ATP phosphoribosyltransferase regulatory subunit (EC 2.4.2.17)              | 627/588/186     |
| HisGs                                                                       |                 |
| Histidinol-phosphate aminotransferase                                       | 555/537         |
| Histidinol phosphatase                                                      | 579/108         |
| <b>Arginine</b>                                                             |                 |
| N-acetyl- $\gamma$ -glutamyl-phosphate reductase                            | 291/660         |
| N-acetylglutamate synthase                                                  | 1191            |
| N-acetylglutamate kinase                                                    | 852             |
| N-acetylornithine aminotransferase                                          | 1134            |
| Ornithine carbamoyltransferase                                              | 828/117         |
| Argininosuccinate synthase                                                  | 1197            |
| Argininosuccinate lyase                                                     | 1380            |
| Arginine pathway regulatory protein ArgR                                    | 459             |
| <b>Production of lactic acid</b>                                            |                 |
| D-lactate dehydrogenase                                                     | 153             |
| L-lactate dehydrogenase                                                     | 915/945/972/978 |
| Predicted L-lactate dehydrogenase, Fe-S oxidoreductase subunit YkgE         | 771             |
| Predicted L-lactate dehydrogenase, hypothetical protein subunit YkgG        | 684             |
| Predicted L-lactate dehydrogenase, Iron-sulfur cluster-binding subunit YkgF | 1473            |
| <b>Active metabolism</b>                                                    |                 |
| Poly (glycerol-phosphate) $\alpha$ -glucosyltransferase                     | 1452/1626       |
| $\beta$ -1,3-glucosyltransferase                                            | 900             |
| Xylose isomerase domain protein TIM barrel                                  | 1320            |
| <b>Enzyme production for food digestion</b>                                 |                 |
| $\alpha$ -amylase                                                           | 1578            |
| Lipases                                                                     | 558             |

|                                                                   |                                     |
|-------------------------------------------------------------------|-------------------------------------|
| Serine protease extracellular                                     | -                                   |
| Serine protease, DegP/HtrA, do-like (EC 3.4.21.-)                 | 1227                                |
| FIG056164: rhomboid family serine protease                        | 693                                 |
| Phytase                                                           | -                                   |
| Cellulase                                                         | -                                   |
| Xylanase                                                          | 1134                                |
| <b>Stress adaptation / host gastrointestinal tract adaptation</b> |                                     |
| <b>Temperature tolerance</b>                                      |                                     |
| Cold shock protein (CSP) family                                   | 132/159/201/159/123/168/<br>150/198 |
| Heat shock protein DnaJ                                           | 1140                                |
| Heat shock protein DnaK                                           | 1824                                |
| Heat shock protein HtpX                                           | -                                   |
| Heat shock protein Hsp33                                          | -                                   |
| Heat shock protein GrpE                                           | 540                                 |
| Heat shock protein Hsp70                                          | -                                   |
| Small heat shock protein                                          | -                                   |
| Ribosome-associated heat shock protein                            | 270                                 |
| Co-chaperonin GroES (heat shock protein)                          | 285                                 |
| Molecular chaperone GroEL (heat shock protein)                    | 1629                                |
| <b>Acid tolerance</b>                                             |                                     |
| ATP synthase subunit a                                            | 714                                 |
| ATP synthase subunit b                                            | 507                                 |
| ATP synthase subunit c                                            | 216                                 |
| ATP synthase $\alpha$ chain                                       | 1503                                |
| ATP synthase $\beta$ chain                                        | 1410                                |
| ATP synthase $\gamma$ chain                                       | 870                                 |
| ATP synthase $\delta$ chain                                       | 426                                 |
| PTS system, cellobiose-specific IIC component                     | 1338                                |
| ATP-dependent Clp protease ATP-binding subunit ClpB               | 1842/2604                           |
| ATP-dependent Clp protease ATP-binding subunit ClpC               | 2451                                |
| ATP-dependent Clp protease ATP-binding subunit ClpE               | 2247                                |
| ATP-dependent Clp protease ATP-binding subunit ClpP               | 600/702                             |
| ATP-dependent Clp protease ATP-binding subunit ClpX               | 666/543                             |
| Glucose-6-phosphate isomerase                                     | 1347                                |
| 13 GTP pyrophosphokinase                                          | 561/681                             |
| Pyruvate kinase                                                   | 1509                                |
| <b>pH tolerance</b>                                               |                                     |
| Sodium-proton antiporter                                          | -                                   |
| Alkaline shock proteins                                           | 402/369                             |
| F0F1-ATPase                                                       | -                                   |
| <b>Bile salts tolerance</b>                                       |                                     |
| Choloylglycine hydrolase                                          | -                                   |
| Bile salt hydrolase                                               | -                                   |
| Glucosamine-6-phosphate deaminase                                 | 714/708                             |
| CTP synthase                                                      | 1608                                |
| DamX                                                              | -                                   |
| <b>Osmotic stress tolerance</b>                                   |                                     |
| Glycine betaine                                                   | -                                   |

|                                                                           |             |
|---------------------------------------------------------------------------|-------------|
| ABC transporter, ATP-binding protein OpuAA                                | 918         |
| ABC transporter, ATP-binding protein BusAA                                | 1227        |
| ABC transporter, substrate binding protein and permease (BusAB.1/BusAB.2) | 1638        |
| ABC transporter, binding protein and permease (OpuAB/OpuAC)               | 1503        |
| Manganese-dependent inorganic pyrophosphatase                             | -           |
| <b>Oxidative stress tolerance</b>                                         |             |
| Catalase                                                                  | -           |
| Thiol peroxidase                                                          | 483         |
| Glutathione reductase                                                     | 1308        |
| Glutathione peroxidase                                                    | 474         |
| NADH peroxidase                                                           | -           |
| NADH oxidase                                                              | 1332/1341   |
| NADH flavin oxidoreductase                                                | -           |
| Haloperoxidase                                                            | -           |
| Iron dependent peroxidase                                                 | -           |
| Thioredoxin reductase (NADPH)                                             | 966/927     |
| Pyruvate oxidase                                                          | 1704        |
| Dihydroorotate oxidase                                                    | -           |
| Cadmium-/manganese-transporting P-type ATPase                             | -           |
| Manganese ABC transporter                                                 | 762/714/906 |

---

**Table S2.** Annotation and localization (locus\_tag) of the main features related to technological, functional and safety properties in *L. lactis* LL16 genome (blastKOALA).

| <b>Features Gene annotation</b>                | <b>Gene</b> | <b>Locus_tag</b> |
|------------------------------------------------|-------------|------------------|
| <b>GAD gene cluster</b>                        |             |                  |
| Glutamate:gamma-aminobutyrate antiporter       | gadC        | INILNILJ_01034   |
| Glutamate decarboxylase, gadB, gadA            | gadAB       | INILNILJ_01046   |
| <b>Lactose utilisation</b>                     |             |                  |
| Lactose phosphotransferase system repressor    | lacR        | INILNILJ_01859   |
| Galactose-6-phosphate isomerase subunit LacA   | lacA        | INILNILJ_01317   |
| Galactose-6-phosphate isomerase subunit LacB   | lacB        | INILNILJ_01318   |
| Tagatose-6-phosphate kinase                    | lacC        | INILNILJ_01316   |
| Tagatose 1,6-bisphosphate aldolase             | lacD        | INILNILJ_01315   |
| PTS system, lactose-specific IIA component     | lacF        | INILNILJ_01314   |
| PTS system, lactose-specific IIBC component    | lacE        | INILNILJ_01313   |
| 6-phospho-beta-galactosidase                   | lacG        | INILNILJ_01312   |
| Aldose 1-epimerase                             | lacX        | INILNILJ_00669   |
| <b>Proteolytic system</b>                      |             |                  |
| U32 family peptidase                           | prtC        | INILNILJ_00675   |
| <b>Oligopeptide permease system</b>            |             |                  |
| Oligopeptide transport ATP-binding protein     | OppD        | INILNILJ_00002   |
| Oligopeptide transport ATP-binding protein     | OppF        | INILNILJ_00001   |
| Oligopeptide transport system permease protein | OppB        | INILNILJ_00004   |
| Oligopeptide transport system permease protein | OppC        | INILNILJ_00003   |
| Oligopeptide binding protein                   | OppA        | INILNILJ_00005   |
|                                                |             | INILNILJ_00006   |
|                                                |             | INILNILJ_00239   |
